# Supplementary material for: Polymeric ionic liquid gels composed of hydrophilic and hydrophobic units for high adsorption selectivity of perrhenate
Source: Royal Society of Chemistry journal article supplement (doi:10.1039/c8ra00838h), 2018-01-01
Supplement: c8ra00838h1.pdf [file c8ra00838h1.pdf]

## Electronic Supplementary Material

# Polymeric ionic liquid gels composed of hydrophilic and hydrophobic units for high adsorption selectivity of perrhenate

**Dong Han,<sup>‡a</sup> Xingxiao Li,<sup>‡a</sup> Yu Cui,<sup>a</sup> Xin Yang,<sup>a</sup> Xibang Chen,<sup>a</sup> Ling Xu,<sup>b</sup> Jing**

**Peng,<sup>\*a</sup> Jiuqiang Li<sup>a</sup> and Maolin Zhai<sup>\*a</sup>**

<sup>a</sup> Beijing National Laboratory for Molecular Sciences, Radiochemistry and Radiation Chemistry Key Laboratory of Fundamental Science, the Key Laboratory of Polymer Chemistry and Physics of the Ministry of Education, College of Chemistry and Molecular Engineering, Peking University, Beijing 100871, China. E-mail: [jpeng@pku.edu.cn](mailto:jpeng@pku.edu.cn); [mlzhai@pku.edu.cn](mailto:mlzhai@pku.edu.cn)

<sup>b</sup> State Key Laboratory of Molecular Vaccinology and Molecular Diagnostics, School of Public Health, Xiamen University, Xiamen Fujian 161102, China.

<sup>‡</sup> These authors contributed equally to this work.

## 1. IR and XPS of PC<sub>2</sub>-C<sub>12</sub>vimNO<sub>3</sub>-A

Before the measure of *SF* of the adsorbent towards ReO<sub>4</sub><sup>-</sup> against NO<sub>3</sub><sup>-</sup>, the anion of the gel should be exchanged into NO<sub>3</sub><sup>-</sup> in order to get rid of the effect of Br<sup>-</sup>. PC<sub>2</sub>-C<sub>12</sub>vimBr-A was immersed into excess *ca.* 1.5 M HNO<sub>3</sub> to equilibrium for 2 times, then into water for 3 times and dried. To confirm the exchange was complete and the polycation of the gel had no change in the ion-exchange process, IR and XPS were performed to the resulted PC<sub>2</sub>-C<sub>12</sub>vimNO<sub>3</sub>-A (Fig. S1).

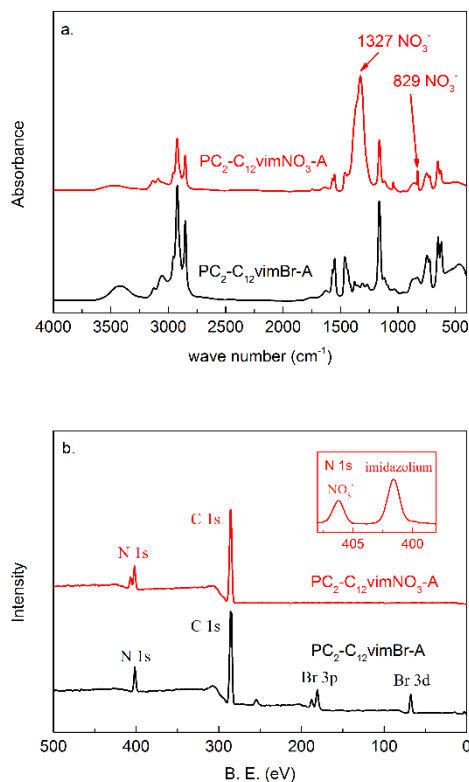

Fig. S1 (a.) IR and (b.) XPS of PC<sub>2</sub>-C<sub>12</sub>vimNO<sub>3</sub>-A prepared from PC<sub>2</sub>-C<sub>12</sub>vimBr-A.

The absorption peak at 1327 and 829 cm<sup>-1</sup> of NO<sub>3</sub><sup>-</sup> occurred in the IR spectrum of PC<sub>2</sub>-C<sub>12</sub>vimNO<sub>3</sub>-A, while the other part of the spectrum was similar to that of PC<sub>2</sub>-C<sub>12</sub>vimBr-A, indicating that NO<sub>3</sub><sup>-</sup> had been exchanged onto the gel and the polycation showed no change. In the XPS of PC<sub>2</sub>-C<sub>12</sub>vimNO<sub>3</sub>-A, the peak of Br disappeared, and the peak of N was divided into double peaks, which belonged to the N atoms in NO<sub>3</sub><sup>-</sup> and imidazolium respectively.

2. IR spectra of C<sub>2</sub>vimBr, C<sub>12</sub>vimBr, C<sub>6</sub>vim<sub>2</sub>Br<sub>2</sub>, PC<sub>2</sub>vimBr, PC<sub>2</sub>-C<sub>12</sub>vimBr-A and PC<sub>12</sub>vimBr.

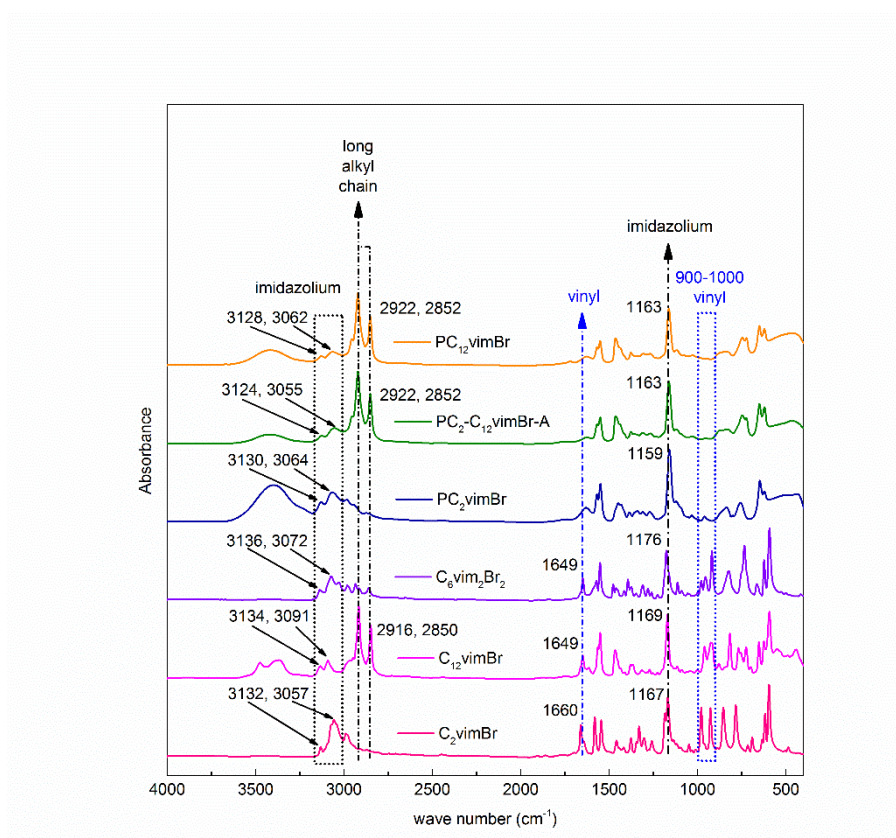

Fig. S2 IR spectra of C<sub>2</sub>vimBr, C<sub>12</sub>vimBr, C<sub>6</sub>vim<sub>2</sub>Br<sub>2</sub>, PC<sub>2</sub>vimBr, PC<sub>2</sub>-C<sub>12</sub>vimBr-A and PC<sub>12</sub>vimBr.

IR was performed to the monomers, crosslinker and the resulted gels (Fig. S2). The IR spectra of C<sub>2</sub>vimBr, C<sub>6</sub>vim<sub>2</sub>Br<sub>2</sub> and PC<sub>2</sub>vimBr were similar to those we reported before<sup>1</sup>. The IR spectrum of C<sub>12</sub>vimBr was similar to that of C<sub>2</sub>vimBr, but the peak of the alkyl chain at 2916 and 2850 cm<sup>-1</sup> were much stronger. The IR spectra of PC<sub>2</sub>-C<sub>12</sub>vimBr-A and PC<sub>12</sub>vimBr were similar to those of the monomers and the crosslinker, but the peaks of vinyl around 1649-1660 cm<sup>-1</sup> and in 900-1000 cm<sup>-1</sup> disappeared in the resultant gels, indicating the successful synthesis of gels.

### 3. TGA of PC<sub>2</sub>vimBr, PC<sub>2</sub>vimNO<sub>3</sub>, PC<sub>2</sub>-C<sub>12</sub>vimBr-A and PC<sub>2</sub>-C<sub>12</sub>vimNO<sub>3</sub>-A

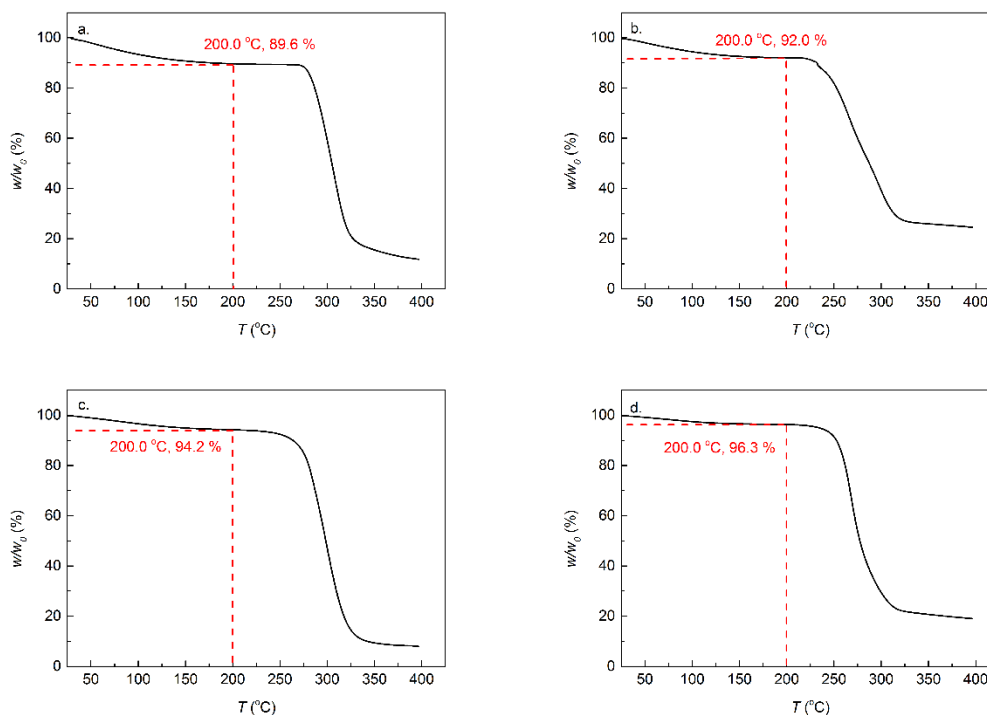

Fig. S3 TGA of (a) PC<sub>2</sub>vimBr, (b) PC<sub>2</sub>vimNO<sub>3</sub>, (c) PC<sub>2</sub>-C<sub>12</sub>vimBr-A and (d) PC<sub>2</sub>-C<sub>12</sub>vimNO<sub>3</sub>-A.

TGA was performed for different gels (Fig. S3). The gels with Br<sup>-</sup> anion had good thermal stability under 250°C, while those with NO<sub>3</sub><sup>-</sup> began to decompose at lower temperature of *ca.* 220°C. Since all gels were stable under 200°C and a flat curve were obtained at that temperature, the gels at 200°C was considered as dried completely, and the  $w/w_0$  at those points was marked in the figures.

### 4. EA of PC<sub>2</sub>-C<sub>12</sub>vimBr gels

Table S1 EA of PC<sub>2</sub>-C<sub>12</sub>vimBr gels

| Sample                                   | N (wt%) | C (wt%) | H (wt%) |
|------------------------------------------|---------|---------|---------|
| PC <sub>12</sub> vimBr                   | 7.78    | 57.1    | 9.12    |
| PC <sub>2</sub> -C <sub>12</sub> vimBr-A | 8.40    | 55.4    | 8.66    |
| PC <sub>2</sub> -C <sub>12</sub> vimBr-B | 9.31    | 51.2    | 8.14    |
| PC <sub>2</sub> -C <sub>12</sub> vimBr-C | 10.1    | 47.8    | 7.52    |
| PC <sub>2</sub> -C <sub>12</sub> vimBr-D | 11.3    | 43.5    | 6.74    |

N contents of PC<sub>2</sub>-C<sub>12</sub>vimBr gels increased from PC<sub>12</sub>vimBr to PC<sub>2</sub>-C<sub>12</sub>vimBr-D, corresponding to the increasing ratio between C<sub>2</sub>vimBr units and C<sub>12</sub>vimBr units, while the C and H content decreased.

## 5. XPS of PC<sub>2</sub>-C<sub>12</sub>vimBr gels

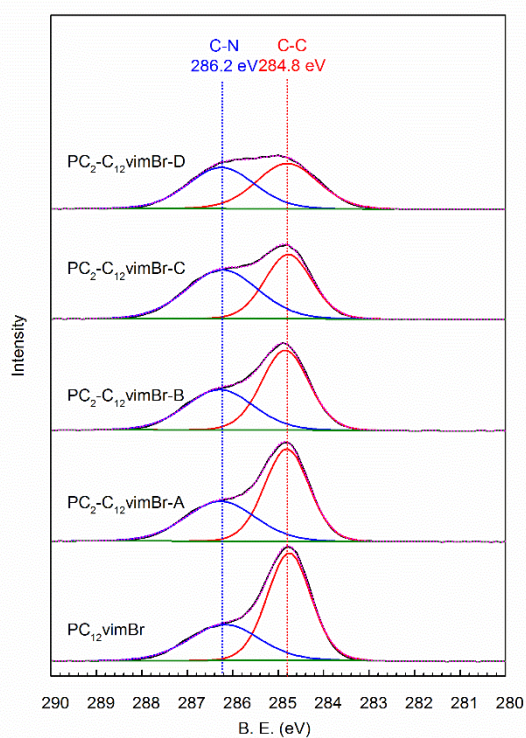

Fig. S4 XPS of PC<sub>2</sub>-C<sub>12</sub>vimBr gels

The XPS of C element in PC<sub>2</sub>-C<sub>12</sub>vimBr gels were shown in Fig. S4. The C 1s peaks in the XPS showed that the C in the gels could be divided into 2 kinds, namely C (C-N) and C (C-C). The C (C-N) atoms have higher B. E. than those of the C (C-C) atoms on the alkyl chains<sup>2</sup>. As the C<sub>2</sub>vimBr content increased from 0 in PC<sub>12</sub>vimBr to 80 mol% in PC<sub>2</sub>-C<sub>12</sub>vimBr-D, the relative intensity of C-C peak vs. C-N peak decreased. It agreed with their composition of the gels, because C<sub>12</sub>vimBr units had more C (C-C) atoms in the alkyl chains.

## 6. SF of PC<sub>2</sub>-C<sub>12</sub>vimNO<sub>3</sub> gels

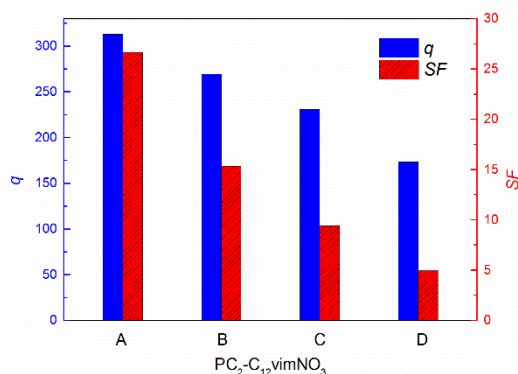

Fig. S5 SF of PC<sub>2</sub>-C<sub>12</sub>vimNO<sub>3</sub> gels

The  $c_0$  was 700 ppm and HNO<sub>3</sub> was 0.0500 mol kg<sup>-1</sup>. Phase ratio was 1 mg gel / 1 g solution.

PC<sub>2</sub>-C<sub>12</sub>vimNO<sub>3</sub> gels were exchanged into PC<sub>2</sub>-C<sub>12</sub>vimNO<sub>3</sub> gels by HNO<sub>3</sub>, then the  $SF$  were measured in a similar way as described in the paper. The  $q$  and  $SF$  decreased as the content of the hydrophobic units decreased, from PC<sub>2</sub>-C<sub>12</sub>vimNO<sub>3</sub>-A to PC<sub>2</sub>-C<sub>12</sub>vimNO<sub>3</sub>-D. Though the hydrophilic cation unit, C<sub>2</sub>vim<sup>+</sup>, has smaller molecular weight, the  $q$  still decreased as its content increased. So it was illustrated that the hydrophobic cation unit, C<sub>12</sub>vim<sup>+</sup>, would bring a higher adsorption selectivity towards ReO<sub>4</sub><sup>-</sup> against NO<sub>3</sub><sup>-</sup>.

### References:

1. D. Han, X. Li, J. Peng, L. Xu, J. Li, H. Li and M. Zhai, *Rsc Advances*, 2016, **6**, 69052-69059.
2. I. J. Villar-Garcia, E. F. Smith, A. W. Taylor, F. L. Qiu, K. R. J. Lovelock, R. G. Jones and P. Licence, *Physical Chemistry Chemical Physics*, 2011, **13**, 2797-2808.
